# Supplementary material for: Prevalence and risk factors for diabetic retinopathy in a cross-sectional population-based study from rural southern China: Dongguan Eye Study
Source: PubMed Central journal article supplement — BMJ Open. 2019 Sep 17;9(9):e023586. doi: 10.1136/bmjopen-2018-023586 (PMC6756414; doi:10.1136/bmjopen-2018-023586), 2019-09-17
Supplement: bmjopen-2018-023586supp001.pdf [file bmjopen-2018-023586supp001.pdf]

Table 1

## 高血压糖尿病危险因素调查问卷

编号: □□□□□

受检者姓名:

尊敬的先生/女士,您好!我们拟进行高血压糖尿病危险因素调查,请您如实回答以下调查问卷内容,您的信息会保存在社区健康档案中给予保密,谢谢您的合作!

n3、您是否每天都食用新鲜蔬菜或者水果?

- ①是 ②否

n7aa、您通常每次运动的时间大概是多少?

- ①<15 分钟 ②15-30 分钟 ③≥30 分钟

n10oeoe、您是否长时间使用过激素(强的松、地塞米松)?(口服或者静滴)

- ①是(激素使用持续的时间为\_a1\_\_个月)

- ②否 ③不清楚

n13ae、您开始有规律吸香烟的时候多少岁? \_\_\_\_\_ 岁,吸烟\_a2\_\_年

n14ae、您平均每天吸烟量:(\_\_\_\_支/天)

- ① 小于 10 支 ②11-20 支 ③21-30 支 ④31-40 支 ⑤41 支以上

n18ae、您有饮酒吗?[选①、②者, \_a5\_\_年,每次\_b3\_\_什么酒(c1)]

- ①每天 ②1-3 次/周 ③每月 1 次或更少 ④从不

n20、您的家人中有高血压患者吗?

- ①有 ②没有 ③不知道

n21、您的家人中有糖尿病患者吗?与您的关系(a7)

- ①有 ②没有 ③不知道

N22、您的家人中有高脂血症患者吗?

- ①有 ②没有 ③不知道

n24、您是否有冠心病?

- ①是\_a9\_\_年 ②否

n25、您的体重最重时曾经达到过\_\_\_\_kg?

28、您是否被医生诊断患过下列疾病?(可多选,在选中的答案打“√”)

- A12 (1) 脑梗塞 ①有 ②没有 ③不知道

- B6 (2) 脑出血 ①有 ②没有 ③不知道

- C4 (3) 心肌梗死 ①有 ②没有 ③不知道

- D3 (4) 心绞痛 ①有 ②没有 ③不知道

- E2 (5) 心力衰竭 ①有 ②没有 ③不知道

F3 (6) 肾功能衰竭 ①有 ②没有 ③不知道

G1 (7) 糖尿病肾病 ①有 ②没有 ③不知道

H1 (8) 视网膜出血性渗出、视乳头水肿 ①有 ②没有 ③不知道

n29、您测量过血压吗？

①没有 ②有，血压不高 ③有，血压高，a13年

n31、您最后一次测量血压值是多少？① a15 / b7 mmHg ②不记得

n32ae、是否有医生告知您有高血压？①是 a16 年 ②否

n34、您检测过血糖吗？

①没有 ②有，血糖不高 ③有，血糖高，a18年

n36、您最后一次检测血糖值是多少？① a20 mmol/L ②不记得

n37ae、是否有医生告知您有糖尿病？①是 a21 年（1型、2型 b8）②否

n42ae、是否有医生告知您有高血脂？①是 a26 年 ②否

n45ae、您知道糖尿病可以引起眼部病变吗？

①知道 ②不知道

n46oeae、您目前采用哪些方法来控制血压和/或血糖？

①非药物治疗 ②药物治疗

③两者都采用 ④没有治疗

b1049、请您列出当前使用的药物名称

降血糖药物名称（b11、不知道、不记得）

问卷结束，谢谢！

调查员：\_\_\_\_\_ 调查日期：\_\_\_\_\_

Table 2

## 眼科问卷 1

## 眼病意识和治疗意识调查表

1. 你第 1 次知道你的眼睛有病，距今有多久（眼病存在的意识）？

患有眼病，距今的时间：\_\_\_\_\_  无眼病  不清楚是否患有眼病

2. 何时知道你的眼病可以治疗（眼病治疗意识）？

患有眼病，何时知道可以治疗：\_\_\_\_\_  无眼病  不清楚是否有眼病  不知道可

以治疗

3. 在检查之前，是否看过医生？  是  否

4. 如果看过医生但你最后未进行手术和药物治疗的原因是什么（眼病治疗障碍）？

①经济问题；②没有时间；③无人陪伴；④还能看到一点(白内障还没有成熟)；

⑤路太远；⑥年龄太大，觉得不需要；⑦害怕手术；⑧害怕丧失视力；

⑨一眼有足够的视力，觉得不需要；⑩有禁忌症。

5. 如果未看过医生或你不去看医生的原因是什么（眼病治疗障碍）？

①经济问题；②没有时间；③无人陪伴；④还能看到一点(白内障还没有成熟)；

⑤路太远；⑥年龄太大，觉得不需要；⑦害怕手术；⑧害怕丧失视力；

⑨一眼有足够的视力，觉得不需要；⑩有禁忌症。

6. 仅对已接受白内障手术者：白内障手术详情（如未做白内障手术者，请在此处划“X”）

|              | 右眼                                                    | 左眼                                                    |
|--------------|-------------------------------------------------------|-------------------------------------------------------|
| 手术时间         |                                                       |                                                       |
| 手术地点         |                                                       |                                                       |
| 防盲流动车        |                                                       |                                                       |
| 公立医院         |                                                       |                                                       |
| 私立医院         |                                                       |                                                       |
| 手术费用         |                                                       |                                                       |
| 完全免费         |                                                       |                                                       |
| 部分免费         |                                                       |                                                       |
| 完全自费         |                                                       |                                                       |
| 是否使用眼镜       | <input type="checkbox"/> 是 <input type="checkbox"/> 否 | <input type="checkbox"/> 是 <input type="checkbox"/> 否 |
| 不用眼镜的原因      |                                                       |                                                       |
| 从未配过         |                                                       |                                                       |
| 丢失           |                                                       |                                                       |
| 损坏           |                                                       |                                                       |
| 不需戴镜（IOL 植入） |                                                       |                                                       |

不需戴镜（另一眼视力好）

手术类型

超声乳化

非超声乳化

是否联合 IOL 植入

是

否

是

否

受试者签名：

2011 年 月 日

Table 3

**眼科问卷 2: 生存质量和视功能调查问卷**

我要问您一些关于您视力的问题，每个问题我说出 4 种答案，请您挑选一个最适合您实际情况的  
答。

| <b>1. 自理：由于视力原因，在无人帮助时，你觉得做下列事情有多大困难？</b>  |       |      |      |      |        |      |
|--------------------------------------------|-------|------|------|------|--------|------|
|                                            | 一点也没有 | 稍有一点 | 有些困难 | 十分困难 | 是否有人帮你 |      |
| 洗澡                                         | 1     | 2    | 3    | 4    | 无= 1   | 有= 2 |
| 自己吃饭                                       | 1     | 2    | 3    | 4    | 无= 1   | 有= 2 |
| 穿衣服                                        | 1     | 2    | 3    | 4    | 无= 1   | 有= 2 |
| 上厕所                                        | 1     | 2    | 3    | 4    | 无= 1   | 有= 2 |
| <b>2. 活动：由于视力原因，在无人帮助您时，您自己做下列事情有多大困难？</b> |       |      |      |      |        |      |
|                                            | 一点也没有 | 稍有一点 | 有些困难 | 十分困难 | 是否有人帮你 |      |
| 走到邻居家                                      | 1     | 2    | 3    | 4    | 无= 1   | 有= 2 |
| 去买东西                                       | 1     | 2    | 3    | 4    | 无= 1   | 有= 2 |
| 做家务                                        | 1     | 2    | 3    | 4    | 无= 1   | 有= 2 |
| <b>3. 社交：由于视力原因，对您参加下列活动的愿望影响有多大？</b>      |       |      |      |      |        |      |
|                                            | 一点也没有 | 稍有一点 | 有些困难 | 十分困难 |        |      |
| 参加婚礼或过节日                                   | 1     | 2    | 3    | 4    |        |      |
| 看朋友或亲戚                                     | 1     | 2    | 3    | 4    |        |      |
| <b>4. 心理：由于视力原因，您是否觉得</b>                  |       |      |      |      |        |      |
|                                            | 一点也不  | 稍有一点 | 比较明显 | 十分明显 |        |      |
| 是别人的负担                                     | 1     | 2    | 3    | 4    |        |      |
| 情绪低落                                       | 1     | 2    | 3    | 4    |        |      |
| 做事无信心                                      | 1     | 2    | 3    | 4    |        |      |
| <b>5. 一般来讲，你认为您的视(眼)力是：</b>                |       |      |      |      |        |      |
| (如果您是戴眼镜的，告诉我您戴镜后的情况)                      | 很好    | 好    | 一般   | 差    |        |      |
|                                            | 1     | 2    | 3    | 4    |        |      |
|                                            | 一点也不  | 稍有一点 | 有些困难 | 十分困难 |        |      |
| 6. 您的视(眼)力对您的日常生活限制有多大？                    | 1     | 2    | 3    | 4    |        |      |
| 7. 您看清路对面的人有多大困难？                          | 1     | 2    | 3    | 4    |        |      |
| 8. 您看清站在您旁边的人脸有多大困难？                       | 1     | 2    | 3    | 4    |        |      |
| 9. 您看清细小的东西(如您手上的谷粒或手纹) 有多大困难？             | 1     | 2    | 3    | 4    |        |      |
| 10.当您一个人向前走路时，发现路边的东西有多大困难？                | 1     | 2    | 3    | 4    |        |      |
| 11.您从亮处来到暗处时，适应暗的环境有多大困难？                  | 1     | 2    | 3    | 4    |        |      |

|                                                      |   |   |   |   |
|------------------------------------------------------|---|---|---|---|
| 12.您从暗处来到亮处时，适应亮的环境有多大困难？                            | 1 | 2 | 3 | 4 |
| 13.当一种东西和其它许多东西混在一起时，您找出它有多大困难？<br>(如从饭碗里找到某种您想吃的食物) | 1 | 2 | 3 | 4 |
| 14.您辨认颜色有多大困难？                                       | 1 | 2 | 3 | 4 |
| 15.当您想拿某样东西(如玻璃杯)时，您要拿到它有多大困难？                       | 1 | 2 | 3 | 4 |
| 16.当您和您要辨认的人都在强光时，您看清对方有多大困难？                        | 1 | 2 | 3 | 4 |
| 17.当强光(如迎面开来汽车灯光)晃您眼时，您看清东西有多大困难？                    | 1 | 2 | 3 | 4 |

---

医生/护士/工作人员：

2011年 月 日
