# Supplementary material for: Prevalence and risk factors for diabetic retinopathy in a cross-sectional population-based study from rural southern China: Dongguan Eye Study
Source: PubMed Central journal article supplement — BMJ Open. 2019 Sep 17;9(9):e023586. doi: 10.1136/bmjopen-2018-023586 (PMC6756414; doi:10.1136/bmjopen-2018-023586), 2019-09-17
Supplement: bmjopen-2018-023586supp002.pdf [file bmjopen-2018-023586supp002.pdf]

### Supplementary Table Questionnaires regarding life styles and systemic medical conditions

| Items                                                                                          | Patients with positive response (%) |
|------------------------------------------------------------------------------------------------|-------------------------------------|
| <i>Life styles</i>                                                                             |                                     |
| Habit of eating fresh fruits and vegetables daily                                              | <b>94.2%</b>                        |
| Exercise more than 30 minutes daily                                                            | 67.8%                               |
| Smoke tobacco                                                                                  | 22.6%                               |
| Drink alcohol                                                                                  | 22.5%                               |
| <i>Clinical history</i>                                                                        |                                     |
| Family history of diabetes                                                                     | 14%                                 |
| Family history of hypertension                                                                 | 28.8%                               |
| Family history of hyperlipidemia                                                               | 1.7%                                |
| History of coronary heart disease (including myocardial infarction, angina, and heart failure) | 4.4%                                |
| History of cerebrovascular disease (including cerebral infarction and cerebral hemorrhage)     | 3.6%                                |
| History of kidney disease                                                                      | 0.8%                                |
| Hypertension in participants with a history of diabetes                                        | 21.2%                               |
| Hypertension in newly diagnosed diabetic participants                                          | 32.0%                               |
| Hypertension in all diabetic participants                                                      | 53.2%                               |
| <i>Awareness of diabetes</i>                                                                   |                                     |
| Diabetic participants understood they had diabetes                                             | 28.1%                               |
| Diabetic participants did not know ocular complications resulted from diabetes                 | 63.3%                               |
| Diabetic participants who never received blood glucose monitoring                              | 41.8%                               |
| Never had routine blood pressure monitoring                                                    | 13.5%                               |
